# Supplementary material for: DNA sequence-dependent ionic currents in ultra-small solid-state nanopores
Source: Royal Society of Chemistry journal article supplement (doi:10.1039/c6nr01061j), 2016-01-01
Supplement: c6nr01061j1.pdf [file c6nr01061j1.pdf]

*Supporting Information for*  
**DNA Sequence-Dependent Ionic Currents in Ultra-Small Solid-State  
Nanopores**

Jeffrey Comer<sup>1</sup> and Aleksei Aksimentiev\*<sup>2</sup>

<sup>1</sup>Nanotechnology Innovation Center of Kansas State, Institute of Computational Comparative Medicine,  
Department of Anatomy and Physiology, Kansas State University, Manhattan, Kansas, 66506

<sup>2</sup>Department of Physics, University of Illinois at Urbana-Champaign, 1110 West Green Street, Urbana, Illinois 61801

---

\*E-mail: aksiment@illinois.edu

Table S1: Data corresponding to Figure 4B. “M” refers to 5-methylcytosine.

| Sequence | $I$ (pA) |            |
|----------|----------|------------|
| ACA      | 31.41    | $\pm 0.49$ |
| AAA      | 31.43    | $\pm 0.50$ |
| ACG      | 31.9     | $\pm 0.51$ |
| AAG      | 33.23    | $\pm 0.52$ |
| AAC      | 33.41    | $\pm 0.52$ |
| CGA      | 34.15    | $\pm 0.58$ |
| AAT      | 35.37    | $\pm 0.54$ |
| GGC      | 35.54    | $\pm 0.70$ |
| AGA      | 36.49    | $\pm 0.59$ |
| ACC      | 36.77    | $\pm 0.56$ |
| CCA      | 36.86    | $\pm 0.54$ |
| GGA      | 36.93    | $\pm 0.66$ |
| CAG      | 37.68    | $\pm 0.59$ |
| GAA      | 37.95    | $\pm 0.59$ |
| GCA      | 38.13    | $\pm 0.60$ |
| ACT      | 38.21    | $\pm 0.55$ |
| AGC      | 38.22    | $\pm 0.65$ |
| TGA      | 38.5     | $\pm 0.62$ |
| CAA      | 38.96    | $\pm 0.56$ |
| CGG      | 39.36    | $\pm 0.64$ |
| ATA      | 39.74    | $\pm 0.55$ |
| GAC      | 40.41    | $\pm 0.63$ |
| GTA      | 40.65    | $\pm 0.67$ |
| GAG      | 41.08    | $\pm 0.63$ |
| CCG      | 41.23    | $\pm 0.57$ |
| CTA      | 42.51    | $\pm 0.60$ |
| GCG      | 42.56    | $\pm 0.65$ |
| CGC      | 42.73    | $\pm 0.64$ |
| GAT      | 42.8     | $\pm 0.65$ |
| GCC      | 43.94    | $\pm 0.67$ |
| CGT      | 44.18    | $\pm 0.66$ |
| CTG      | 44.24    | $\pm 0.66$ |
| TAA      | 44.79    | $\pm 0.61$ |
| CAC      | 44.81    | $\pm 0.59$ |
| CAT      | 45.25    | $\pm 0.60$ |
| ATG      | 45.55    | $\pm 0.60$ |
| TAG      | 45.88    | $\pm 0.63$ |
| TGC      | 45.93    | $\pm 0.67$ |
| ATC      | 46.01    | $\pm 0.63$ |
| GTC      | 46.41    | $\pm 0.75$ |
| GGT      | 46.62    | $\pm 0.73$ |
| AGT      | 46.63    | $\pm 0.65$ |
| TTA      | 46.73    | $\pm 0.64$ |
| AGG      | 46.9     | $\pm 0.65$ |
| GCT      | 47.23    | $\pm 0.68$ |
| GGG      | 47.66    | $\pm 0.72$ |
| TCA      | 48.56    | $\pm 0.61$ |
| TGG      | 49.02    | $\pm 0.69$ |
| TAC      | 50.69    | $\pm 0.62$ |
| TCG      | 51.04    | $\pm 0.63$ |
| TGT      | 51.21    | $\pm 0.69$ |
| CCC      | 52.25    | $\pm 0.65$ |
| ATT      | 52.33    | $\pm 0.64$ |
| TAT      | 53.27    | $\pm 0.64$ |
| CCT      | 53.58    | $\pm 0.64$ |

|       |       |        |
|-------|-------|--------|
| GTG   | 55.9  | ± 0.73 |
| TTG   | 56.19 | ± 0.70 |
| CTC   | 58.16 | ± 0.68 |
| TCC   | 59.83 | ± 0.69 |
| GTT   | 60.58 | ± 0.78 |
| CTT   | 60.94 | ± 0.70 |
| TTC   | 62.19 | ± 0.73 |
| TCT   | 63.08 | ± 0.69 |
| TTT   | 69.44 | ± 0.76 |
| <hr/> |       |        |
| AMA   | 32.05 | ± 0.49 |
| AMG   | 32.91 | ± 0.51 |
| AAM   | 33.43 | ± 0.52 |
| MGA   | 33.26 | ± 0.59 |
| GGM   | 34.43 | ± 0.7  |
| AMM   | 40.68 | ± 0.58 |
| MMA   | 40.07 | ± 0.57 |
| MAG   | 40.2  | ± 0.61 |
| GMA   | 40.96 | ± 0.62 |
| AMT   | 39.34 | ± 0.56 |
| AGM   | 37.66 | ± 0.64 |
| MAA   | 39.65 | ± 0.58 |
| MGG   | 39.45 | ± 0.65 |
| GAM   | 42.32 | ± 0.63 |
| MMG   | 44.19 | ± 0.6  |
| MTA   | 41.97 | ± 0.6  |
| GMG   | 43.21 | ± 0.66 |
| MGM   | 44.21 | ± 0.65 |
| GMM   | 46.28 | ± 0.7  |
| MGT   | 44.34 | ± 0.67 |
| MTG   | 44.52 | ± 0.66 |
| MAM   | 46.33 | ± 0.59 |
| MAT   | 45.78 | ± 0.61 |
| TGM   | 47.58 | ± 0.68 |
| ATM   | 47.31 | ± 0.63 |
| GTM   | 48.08 | ± 0.76 |
| GMT   | 50.21 | ± 0.7  |
| TMA   | 51.38 | ± 0.63 |
| TAM   | 51.17 | ± 0.63 |
| TMG   | 52.17 | ± 0.64 |
| MMM   | 55.43 | ± 0.68 |
| MMT   | 56.43 | ± 0.68 |
| MTM   | 58.37 | ± 0.69 |
| TMM   | 61.69 | ± 0.71 |
| MTT   | 61.09 | ± 0.7  |
| TTM   | 64.32 | ± 0.74 |
| TMT   | 64.97 | ± 0.71 |

Table S2: Data corresponding to Figure 4C.

| Sequence | $I$ (pA) |            |
|----------|----------|------------|
| GGC      | 27.87    | $\pm 0.32$ |
| AGA      | 31.13    | $\pm 0.33$ |
| GGA      | 31.32    | $\pm 0.32$ |
| AGC      | 31.44    | $\pm 0.34$ |
| GAG      | 33.49    | $\pm 0.37$ |
| GCG      | 34.31    | $\pm 0.37$ |
| CGA      | 34.32    | $\pm 0.38$ |
| GTC      | 34.87    | $\pm 0.39$ |
| GCC      | 34.91    | $\pm 0.41$ |
| ACG      | 35.17    | $\pm 0.40$ |
| AAA      | 35.19    | $\pm 0.38$ |
| GAA      | 35.26    | $\pm 0.36$ |
| GCA      | 35.73    | $\pm 0.37$ |
| AAG      | 35.75    | $\pm 0.39$ |
| TGA      | 35.96    | $\pm 0.51$ |
| GTA      | 36.25    | $\pm 0.36$ |
| GGT      | 36.33    | $\pm 0.34$ |
| GAC      | 36.35    | $\pm 0.38$ |
| CGG      | 36.9     | $\pm 0.41$ |
| CAG      | 36.96    | $\pm 0.40$ |
| AGT      | 37.69    | $\pm 0.35$ |
| GAT      | 37.85    | $\pm 0.38$ |
| ACA      | 37.91    | $\pm 0.41$ |
| CGC      | 37.98    | $\pm 0.38$ |
| CGT      | 39.05    | $\pm 0.39$ |
| ATA      | 39.22    | $\pm 0.38$ |
| AAC      | 39.27    | $\pm 0.42$ |
| CAA      | 39.61    | $\pm 0.40$ |
| TGC      | 39.77    | $\pm 0.37$ |
| ACC      | 39.84    | $\pm 0.46$ |
| AAT      | 39.9     | $\pm 0.42$ |
| GCT      | 40.22    | $\pm 0.41$ |
| AGG      | 40.35    | $\pm 0.36$ |
| TAA      | 40.4     | $\pm 0.39$ |
| GGG      | 40.69    | $\pm 0.35$ |
| ATC      | 40.93    | $\pm 0.42$ |
| ACT      | 41.14    | $\pm 0.45$ |
| TAG      | 42.4     | $\pm 0.42$ |
| TGG      | 42.87    | $\pm 0.41$ |
| CCG      | 43.26    | $\pm 0.43$ |
| CCA      | 43.38    | $\pm 0.44$ |
| CTG      | 44.46    | $\pm 0.46$ |
| CTA      | 44.51    | $\pm 0.44$ |
| TGT      | 45.14    | $\pm 0.38$ |
| ATG      | 45.29    | $\pm 0.40$ |
| GTG      | 46.28    | $\pm 0.38$ |
| CAT      | 46.7     | $\pm 0.43$ |
| CAC      | 47.2     | $\pm 0.43$ |
| TTA      | 47.26    | $\pm 0.43$ |
| TCG      | 47.91    | $\pm 0.42$ |
| TAC      | 48.7     | $\pm 0.51$ |
| GTT      | 48.87    | $\pm 0.41$ |
| TCA      | 49.36    | $\pm 0.43$ |
| ATT      | 50.84    | $\pm 0.44$ |
| TAT      | 51.66    | $\pm 0.43$ |
| TTG      | 52.19    | $\pm 0.57$ |

|       |       |        |
|-------|-------|--------|
| CCC   | 53.22 | ± 0.49 |
| CCT   | 54.69 | ± 0.49 |
| TCC   | 58.79 | ± 0.50 |
| CTC   | 58.96 | ± 0.51 |
| TTC   | 59.55 | ± 0.49 |
| CTT   | 60.09 | ± 0.52 |
| TCT   | 61.64 | ± 0.49 |
| TTT   | 66.71 | ± 0.51 |
| <hr/> |       |        |
| GGM   | 27.04 | ± 0.32 |
| AGM   | 31.47 | ± 0.34 |
| GMG   | 34.7  | ± 0.37 |
| MGA   | 32.97 | ± 0.37 |
| GTM   | 35.28 | ± 0.39 |
| GMM   | 36.2  | ± 0.41 |
| AMG   | 35.62 | ± 0.4  |
| GMA   | 35.73 | ± 0.36 |
| GAM   | 37.13 | ± 0.38 |
| MGG   | 36.49 | ± 0.41 |
| MAG   | 37.17 | ± 0.4  |
| AMA   | 38.28 | ± 0.41 |
| MGM   | 38.38 | ± 0.38 |
| MGT   | 39.03 | ± 0.39 |
| AAM   | 40.52 | ± 0.43 |
| MAA   | 38.61 | ± 0.39 |
| TGM   | 40.41 | ± 0.38 |
| AMM   | 40.69 | ± 0.46 |
| GMT   | 40.91 | ± 0.41 |
| ATM   | 41.31 | ± 0.42 |
| AMT   | 41.99 | ± 0.45 |
| MMG   | 45.11 | ± 0.43 |
| MMA   | 43.62 | ± 0.43 |
| MTG   | 44.74 | ± 0.45 |
| MTA   | 43.96 | ± 0.43 |
| MAT   | 45.98 | ± 0.42 |
| MAM   | 48.57 | ± 0.44 |
| TMG   | 48.99 | ± 0.42 |
| TAM   | 51.97 | ± 0.43 |
| TMA   | 49.38 | ± 0.43 |
| MMM   | 53.48 | ± 0.49 |
| MMT   | 54.29 | ± 0.48 |
| TMM   | 61.13 | ± 0.51 |
| MTM   | 58.73 | ± 0.51 |
| TTM   | 59.56 | ± 0.5  |
| MTT   | 61.39 | ± 0.52 |
| TMT   | 62.63 | ± 0.49 |

Table S3: Data corresponding to Figure 4D.

| Sequence | $I$ (pA) |            |
|----------|----------|------------|
| GAA      | 19.86    | $\pm 0.32$ |
| GAC      | 20.68    | $\pm 0.34$ |
| GAG      | 23.32    | $\pm 0.36$ |
| GAT      | 23.43    | $\pm 0.36$ |
| GCA      | 24.93    | $\pm 0.34$ |
| AGA      | 25.0     | $\pm 0.35$ |
| GCC      | 25.92    | $\pm 0.40$ |
| AGC      | 26.45    | $\pm 0.39$ |
| AAG      | 27.93    | $\pm 0.37$ |
| GTA      | 28.17    | $\pm 0.38$ |
| GCG      | 28.36    | $\pm 0.40$ |
| GGA      | 28.5     | $\pm 0.39$ |
| TGA      | 29.6     | $\pm 0.40$ |
| CGA      | 29.97    | $\pm 0.37$ |
| AGT      | 30.15    | $\pm 0.41$ |
| ACG      | 30.22    | $\pm 0.38$ |
| GGC      | 30.59    | $\pm 0.44$ |
| GCT      | 31.09    | $\pm 0.43$ |
| AGG      | 31.16    | $\pm 0.41$ |
| ATG      | 31.68    | $\pm 0.41$ |
| ATA      | 31.84    | $\pm 0.36$ |
| AAA      | 31.93    | $\pm 0.35$ |
| ACC      | 31.94    | $\pm 0.39$ |
| ACA      | 32.22    | $\pm 0.36$ |
| AAT      | 32.68    | $\pm 0.38$ |
| AAC      | 32.93    | $\pm 0.37$ |
| GTC      | 33.41    | $\pm 0.43$ |
| GTG      | 34.05    | $\pm 0.40$ |
| ATC      | 34.8     | $\pm 0.41$ |
| ACT      | 34.97    | $\pm 0.41$ |
| CCA      | 35.24    | $\pm 0.40$ |
| CGC      | 35.38    | $\pm 0.42$ |
| TCG      | 35.48    | $\pm 0.46$ |
| TGC      | 35.84    | $\pm 0.45$ |
| CCG      | 35.86    | $\pm 0.44$ |
| CTG      | 36.26    | $\pm 0.47$ |
| CGG      | 36.37    | $\pm 0.44$ |
| TAA      | 36.86    | $\pm 0.38$ |
| ATT      | 37.11    | $\pm 0.45$ |
| TAG      | 37.24    | $\pm 0.41$ |
| TGG      | 37.26    | $\pm 0.46$ |
| CAG      | 37.35    | $\pm 0.42$ |
| TCA      | 37.38    | $\pm 0.41$ |
| CGT      | 38.52    | $\pm 0.44$ |
| TGT      | 40.18    | $\pm 0.48$ |
| TTG      | 42.53    | $\pm 0.50$ |
| TAT      | 43.04    | $\pm 0.42$ |
| GTT      | 43.41    | $\pm 0.47$ |
| CAA      | 43.43    | $\pm 0.41$ |
| TAC      | 43.59    | $\pm 0.40$ |
| CTA      | 43.63    | $\pm 0.43$ |
| GGT      | 43.65    | $\pm 0.49$ |
| CCC      | 44.11    | $\pm 0.46$ |
| TTA      | 44.26    | $\pm 0.46$ |
| TCC      | 45.05    | $\pm 0.47$ |
| GGG      | 45.17    | $\pm 0.47$ |

|     |       |            |
|-----|-------|------------|
| CAT | 45.79 | $\pm 0.43$ |
| CAC | 46.62 | $\pm 0.42$ |
| CCT | 48.33 | $\pm 0.50$ |
| TCT | 49.65 | $\pm 0.49$ |
| CTC | 49.9  | $\pm 0.48$ |
| CTT | 54.1  | $\pm 0.52$ |
| TTC | 55.02 | $\pm 0.52$ |
| TTT | 59.76 | $\pm 0.55$ |

Table S4: Pairwise RMSD of DNA conformations featured in Figure 5. The RMSD was calculated using the coordinates of four nucleotides nearest the pore without alignment

| Conform. 1 | Conform. 2 | RMSD ( $\text{\AA}$ ) |
|------------|------------|-----------------------|
| Y0         | Y1         | 3.487                 |
| Y0         | Y2         | 6.095                 |
| Y0         | Y3         | 1.180                 |
| Y0         | X0         | 6.340                 |
| Y1         | Y2         | 6.675                 |
| Y1         | Y3         | 3.487                 |
| Y1         | X0         | 5.973                 |
| Y2         | Y3         | 6.101                 |
| Y2         | X0         | 8.719                 |
| Y3         | X0         | 6.68                  |
